# Supplementary material for: Influence of Personality and Differences in Stress Processing Among Finnish Students on Interest to Use a Mobile Stress Management App: Survey Study
Source: PubMed Central journal article supplement (PMC6707572; doi:10.2196/10039), 2019-05-13
Supplement: mental_v6i5e10039_app1.pdf [file mental_v6i5e10039_app1.pdf]

Multimedia Appendix 1. Intercorrelations (r value; *P* value) between Study 1 variables.

| Variable,<br>r value; <i>P</i> value | HAP            | SOC            | FIN            | HEA            | RUM            | STR            | ABS            | CESD           | GAD            | N              | E             | A             | C            |
|--------------------------------------|----------------|----------------|----------------|----------------|----------------|----------------|----------------|----------------|----------------|----------------|---------------|---------------|--------------|
| HAP                                  | -              |                |                |                |                |                |                |                |                |                |               |               |              |
| SOC                                  | .33;<br><.001  | -              |                |                |                |                |                |                |                |                |               |               |              |
| FIN                                  | -.33;<br><.001 | -.29;<br><.001 | -              |                |                |                |                |                |                |                |               |               |              |
| HEA                                  | .40;<br><.001  | .22;<br><.001  | -.27;<br><.001 | -              |                |                |                |                |                |                |               |               |              |
| RUM                                  | -.32;<br><.001 | -.19;<br><.001 | .25;<br><.001  | -.25;<br><.001 | -              |                |                |                |                |                |               |               |              |
| STR                                  | -.38;<br><.001 | -.21;<br><.001 | .32;<br><.001  | -.31;<br><.001 | .56;<br><.001  | -              |                |                |                |                |               |               |              |
| ABS                                  | -.14;<br>.001  | -.13;<br>.002  | .23;<br><.001  | -.22;<br><.001 | .20;<br><.001  | .29;<br><.001  | -              |                |                |                |               |               |              |
| CESD                                 | -.50;<br><.001 | -.30;<br><.001 | .35;<br><.001  | -.44;<br><.001 | .59;<br><.001  | .61;<br><.001  | .28;<br><.001  | -              |                |                |               |               |              |
| GAD                                  | -.34;<br><.001 | -.22;<br><.001 | .29;<br><.001  | -.35;<br><.001 | .52;<br><.001  | .65;<br><.001  | .26;<br><.001  | .77;<br><.001  | -              |                |               |               |              |
| N                                    | -.43;<br><.001 | -.31;<br><.001 | .35;<br><.001  | -.37;<br><.001 | .74;<br><.001  | .68;<br><.001  | .30;<br><.001  | .76;<br><.001  | .69;<br><.001  | -              |               |               |              |
| E                                    | .36;<br><.001  | .32;<br><.001  | -.14;<br><.001 | .23;<br><.001  | -.38;<br><.001 | -.23;<br><.001 | -.11;<br>.006  | -.42;<br><.001 | -.23;<br><.001 | -.44;<br><.001 | -             |               |              |
| A                                    | .24;<br><.001  | .13;<br>.002   | -.09;<br>.02   | .15;<br><.001  | -.22;<br><.001 | -.13;<br>.001  | -.04;<br>.32   | -.25;<br><.001 | -.20;<br><.001 | -.24;<br><.001 | .37;<br><.001 | -             |              |
| C                                    | .25;<br><.001  | .22;<br><.001  | -.14;<br>.000  | .20;<br><.001  | -.16;<br><.001 | -.11;<br>.004  | -.16;<br><.001 | -.26;<br><.001 | -.10;<br>.01   | -.25;<br><.001 | .30;<br><.001 | .21;<br><.001 | -            |
| O                                    | .36;<br><.001  | .01;<br>.72    | .13;<br>.001   | -.06;<br>.13   | -.01;<br>.80   | .13;<br>.001   | .20;<br><.001  | .04;<br>.26    | .08;<br>.038   | -.02;<br>.71   | .14;<br><.001 | .06;<br>.13   | .01;<br>.880 |

a. HAP, happiness; SOC, social status; FIN, financial situation; HEA, health situation; RUM, rumination; STR, self-reported stress; ABS, absence from work for psychological reasons; CESD, depressive symptoms; GAD, anxiety; N, neuroticism; E, extraversion; A, agreeableness; C, conscientiousness; O, openness to experience.
